# Supplementary material for: Screening a specific Zn(ii)-binding peptide for improving the cognitive decline of Alzheimer's disease in APP/PS1 transgenic mice by inhibiting Zn2+-mediated amyloid protein aggregation and neurotoxicity
Source: Royal Society of Chemistry journal article supplement (doi:10.1039/c9bm00676a), 2019-01-01
Supplement: c9bm00676a1.pdf [file c9bm00676a1.pdf]

## Supporting Information

Screening a specific Zn(II)-binding peptide for improving the cognitive decline of Alzheimer's disease in APP/PS1 transgenic mice by inhibiting Zn<sup>2+</sup>-mediated amyloid protein aggregation and neurotoxicity

*Xiaoyu Zhang, Manli Zhong, Pu Zhao, Xiancheng Zhang, You Li, Xuliang Wang, Jia Sun, Wang Lan, Hehong Sun, Zhanyou Wang \* and Huiling Gao \**

*College of Life and Health Sciences, Northeastern University, Shenyang, China.*

\*E-mail: [wangzy@neu.edu.cn](mailto:wangzy@neu.edu.cn) (Z.-Y. Wang); [gaohuiling@mail.neu.edu.cn](mailto:gaohuiling@mail.neu.edu.cn) (H.-L. Gao).

TEL/FAX: +86-024-83656109

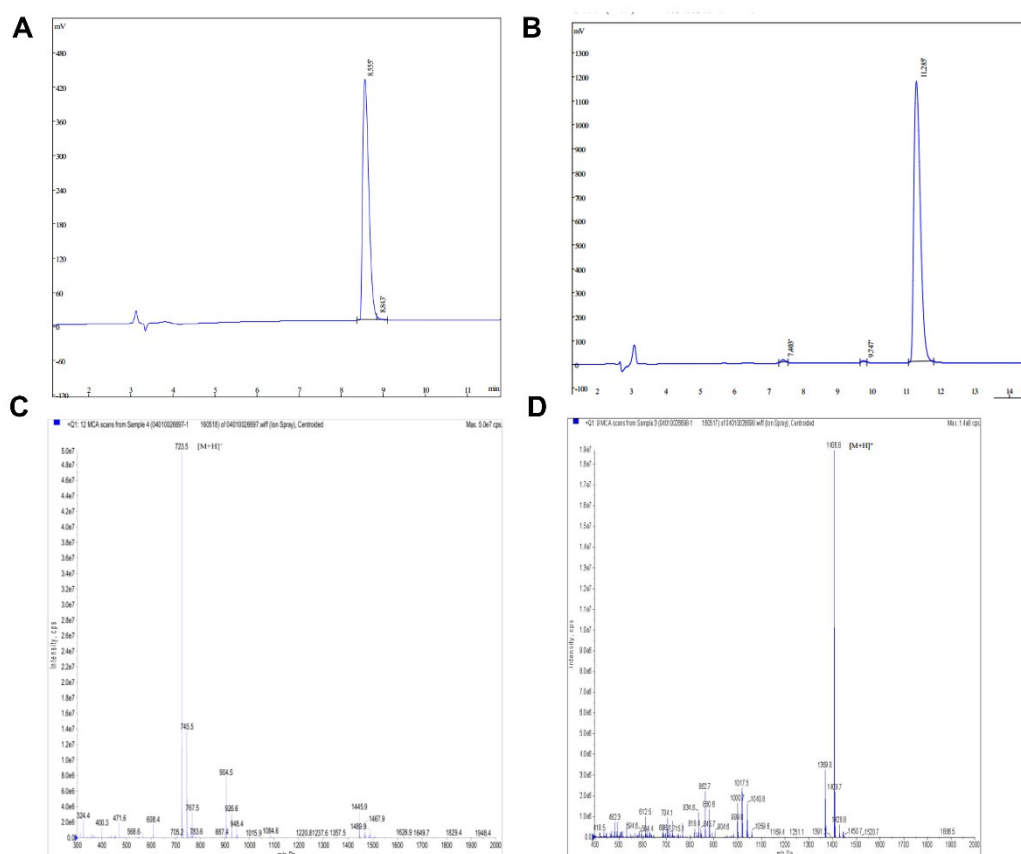

**Figure S1. Analysis of the synthetic PZn and Fitc-PZn. (A-B) HPLC chromatogram. (C-D) Electrospray ionization mass spectrum.**

The result of HPLC analysis showed that the purity of PZn and Fitc-PZn were greater than 95%. The results of mass spectrometry analysis showed that the molecular weights of synthesized PZn and Fitc-PZn were consistent with the theoretical values.

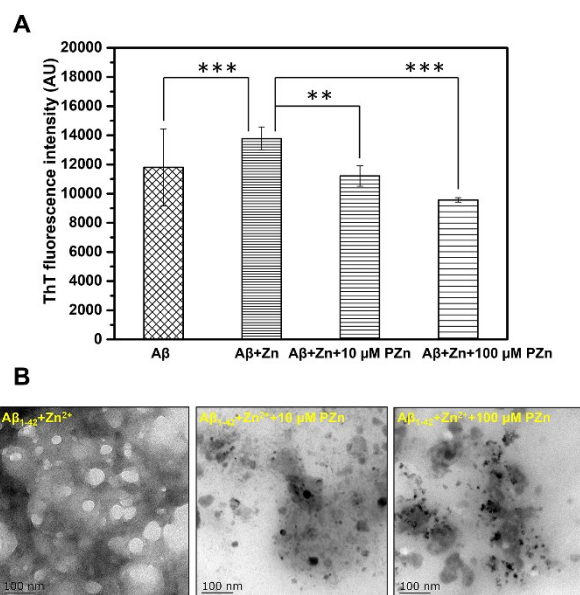

**Figure S2. PZn inhibited Zn<sup>2+</sup>-induced aggregation of Aβ<sub>1-42</sub> in vitro.** Aβ<sub>1-42</sub> were incubated with 70 μM Zn<sup>2+</sup>, 10 μM PZn + 70 μM Zn<sup>2+</sup> and 100 μM PZn + 70 μM Zn<sup>2+</sup>. **(A)** ThT fluorescence assay. **(B)** TEM images of Aβ<sub>1-42</sub> aggregation under different solution conditions. Scale bar :100 nm. The data represent the mean ± S.E. of 3 independent experiments. \*\*,  $p < 0.01$ ; \*\*\*,  $p < 0.001$  compared to the Zn<sup>2+</sup>-induced group.

ThT fluorescence intensity showed that Zn<sup>2+</sup> induced a rapid increase of Aβ<sub>1-42</sub> aggregation at 2 h (**Figure S2A**), and the aggregation was inhibited by PZn. As shown in **Figure S2B**, Aβ<sub>1-42</sub> mostly aggregated into amorphous aggregates that were stacked together under Zn<sup>2+</sup> treatment. In the presence of PZn, only a few small amorphous and granular aggregates were observed. This indicated that PZn inhibited Zn<sup>2+</sup>-induced aggregation of Aβ.

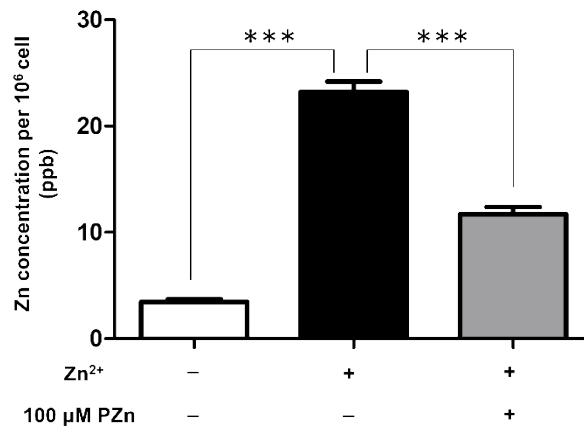

**Figure S3. PZn alone reduced zinc concentration in N2a-sw cells.** N2a-sw cells were treated with 70 μM Zn<sup>2+</sup> or co-incubated Zn<sup>2+</sup> with 100 μM PZn for 12 h. Zinc levels in N2a-sw cells analyzed by ICP-MS. The data represent the mean ± S.E. of 3 independent experiments. \*\*\*,  $p < 0.001$  compared to the Zn<sup>2+</sup>-damage group.

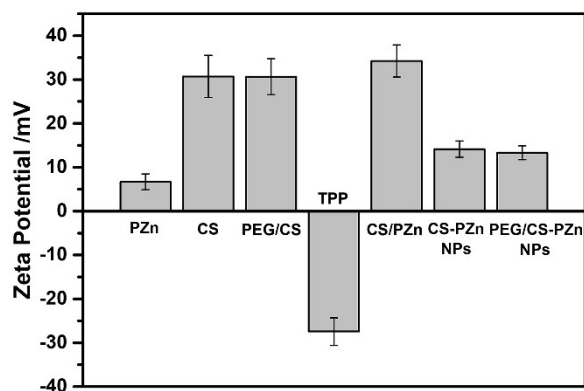

**Figure S4. The corresponding zeta potentials at each step of PEG/CS-PZn NPs preparing process.**

Zeta potential measurement was conducted by laser light scattering on a Malvern Particle Size Analyzer (Malvern Instruments Ltd., Nano-ZS90, Malvern, Worcestershire, UK).

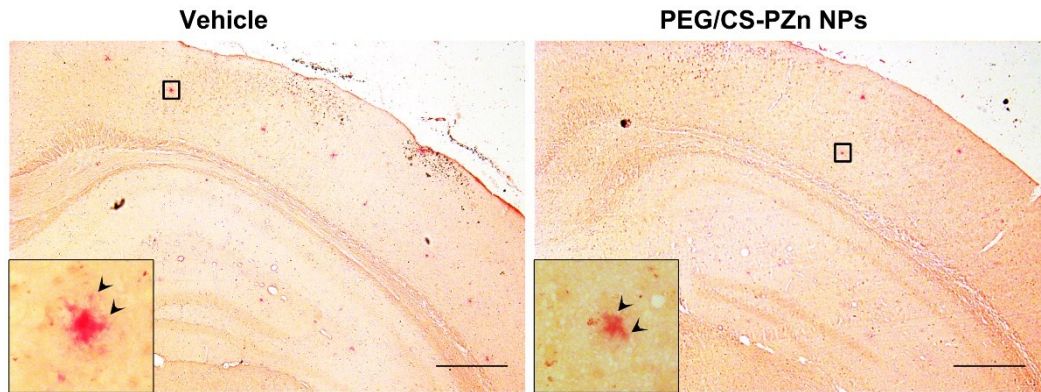

**Figure S5. PEG/CS-PZn NPs reduced amyloid plaque deposition in APP/PS1 mouse brain.** Six-month-old APP/PS1 mice were treated with PEG/CS-PZn NPs for 3 months. The brains were collected and stained with Congo red. Representative images of A $\beta$  aggregation staining in cortex and hippocampus. Arrows showed the representative morphology at higher magnification. Scale bars: 500  $\mu$ m.

PEG/CS-PZn NPs treatment decreased the number of plaques in the cortex and the hippocampus of APP/PS1 mice. It was obviously observed that the plaques were reduced at the edge with no changes in the center under high magnification. These morphological results indicated that PEG/CS-PZn NPs could really reduce the aggregation of A $\beta$  consistent with the results of immunohistochemistry.
